# Supplementary material for: Fruit and vegetable consumption and all-cause, cancer and CVD mortality: analysis of Health Survey for England data
Source: PubMed Central journal article supplement — J Epidemiol Community Health. 2014 Mar 31;68(9):856–62. doi: 10.1136/jech-2013-203500 (PMC4145465; doi:10.1136/jech-2013-203500), 2014-03-31
Supplement: jech-2013-203500-s1.pdf [file jech-2013-203500-s1.pdf]

## Web appendix. The Health Survey for England Individual Questionnaire

### Fruit and vegetable consumption

---

**IF Age of respondent >= 5 THEN**

**VFInt**

Now we are moving on to a different topic, and I'd like to ask you a few questions about some of the things you ate and drank yesterday. By yesterday I mean 24 hours from midnight to midnight. First I'd like to ask you some questions about the amount of fruit and vegetables you have eaten

1 Continue

**VegSal**

Did you eat any salad yesterday? Don't count potato, pasta or rice salad or salad in a sandwich.  
INTERVIEWER: SALADS MADE MAINLY FROM BEANS CAN **EITHER** BE INCLUDED HERE **OR** AT THE NEXT QUESTION.

1 Yes

2 No

**IF VegSal = Yes THEN**

**VegSalQ**

How many cereal bowls full of salad did you eat yesterday?

IF ASKED: 'Think about an average-sized cereal bowl'.

Range: 0.5 - 50.0

**ENDIF**

**VegPul**

Did you eat any pulses yesterday? By pulses I mean lentils and all kinds of peas and beans, including chickpeas and baked beans. Don't count pulses in foods like Chilli con carne.

1 Yes

2 No

**IF VegPul = Yes THEN**

**VegPulQ**

**SHOWCARD H1**

How many tablespoons of pulses did you eat yesterday?

IF ASKED: 'Think about a heaped or full tablespoon'.

Range: 0.5 - 50.0

**ENDIF**

**VegVeg**

Not counting potatoes, did you eat any vegetables yesterday?

Include fresh, raw, tinned and frozen vegetables.

1 Yes

2 No

**IF VegVeg = Yes THEN**

**VegVegQ**

**SHOWARD H1**

How many tablespoons of vegetables did you eat yesterday?

IF ASKED: 'Think about a heaped or full tablespoon'.

Range: 0.5 - 50.0

**ENDIF**

**VegDish**

*Apart from anything you have already told me about, did / Did you eat any other dishes made **mainly** from vegetables or pulses yesterday, such as vegetable lasagne or vegetable curry?*

Don't count vegetable soups or dishes made mainly from potatoes.

- 1 Yes
- 2 No

**IF VegDish = Yes THEN****VegDishQ****SHOWCARD H1**

How many tablespoons of vegetables or pulses did you eat *in these kinds of dishes* yesterday?

IF ASKED: 'Think about a heaped or full tablespoon'.

Range: 0.5 - 50.0

**ENDIF****VegUsual**

Compared with the amount of vegetables, salads and pulses you usually eat, would you say that yesterday you ate...

...READ OUT...

- 1 less than usual,
- 2 more than usual,
- 3 or about the same as usual?

**FrtDrnk**

Not counting cordials, fruit-drinks and squashes, did you drink any fruit juice yesterday?

- 1 Yes
- 2 No

**IF FrtDrnk = Yes THEN****FrtDrnkQ**

How many small glasses of fruit juice did you drink yesterday?

IF ASKED: 'A small glass is about a quarter of a pint'.

Range: 0.5-.50.0

**ENDIF****Frt**

Did you eat any fresh fruit yesterday? Don't count fruit salads, fruit pies, etc.

- 1 Yes
- 2 No

**IF Frt = Yes THEN****FOR idx:= 1 TO 15 DO****IF (idx = 1) OR (FrtMor[idx-1] = Yes) THEN****FrtC[idx]**

What kind of fresh fruit did you eat yesterday?

INTERVIEWER: USE THE **FRESH FRUIT SIZE LIST** IN YOUR

SHOWCARDS/CODING FRAMES TO CODE THE SIZE OF THIS FRUIT. IF MORE THAN ONE KIND OF FRUIT MENTIONED, CODE ONE HERE ONLY

- 1 Very large fruit
- 2 Large fruit
- 3 Medium-sized fruit
- 4 Small fruit
- 5 Very small fruit
- 6 Not on coding list

```

IF FrtC[idx] IN [VLge..VSml] THEN
  IF FrtC[idx] = VLge THEN
    much:= 'many average slices'
  ELSEIF FrtC[idx] IN [Lge..Sml] THEN
    much:= 'much'
  ELSEIF FrtC[idx] = VSml THEN
    much:= 'many average handfuls'
  ENDIF
FrtQ[idx]
  How much of this fruit did you eat yesterday?
  Range: 0.5-.50.0

```

```

ELSEIF FrtC[idx] = NotLst THEN
  FrtOth[idx]
    What was the name of this fruit?
    Text: Maximum 50 characters

```

```

  FrtNotQ[idx]
    How much of this fruit did you eat?
    Text: Maximum 50 characters

```

```

ENDIF

```

```

IF idx < 15 THEN
  FrtMor[idx]
    Did you eat any other fresh fruit yesterday?
    1      Yes
    2      No

```

```

ENDIF

```

```

ENDIF

```

```

ENDDO

```

```

ENDIF

```

*FrtC to FrtMor repeated for up to 15 different types of fruit*

**FrtDry**

Did you eat any dried fruit yesterday? Don't count dried fruit in cereal, cakes, etc.

```

1      Yes
2      No

```

```

IF FrtDry = Yes THEN

```

```

  FrtDryQ

```

```

  SHOWCARD H1

```

How many tablespoons of dried fruit did you eat yesterday?

IF ASKED: 'Think about a heaped or full tablespoon!.'

```

  Range: 0.5-.50.0

```

```

ENDIF

```

**FrtFroz**

Did you eat any frozen or tinned fruit yesterday?

```

1      Yes
2      No

```

**IF FrtFroz = Yes THEN**

**Fr\_tFrozQ**

**SHOWCARD H1**

How many tablespoons of frozen or tinned fruit did you eat yesterday?

IF ASKED: 'Think about a heaped or full tablespoon'.

Range: 0.5.-.50.0

**ENDIF**

**Fr\_tDish**

*Apart from anything you have already told me about, did/Did you eat any other dishes made **mainly** from fruit yesterday, such as fruit salad or fruit pie? Don't count fruit in yoghurts.*

1 Yes

2 No

**IF Fr\_tDish = Yes THEN**

**Fr\_tDishQ**

**SHOWCARD H1**

How many tablespoons of fruit did you eat *in these kinds of dishes* yesterday?

IF ASKED: 'Think about a heaped or full tablespoon'.

Range: 0.5.-.50.0

**ENDIF**
